# Supplementary material for: Uniform iron oxide hollow spheres for high-performance delivery of insoluble anticancer drugs
Source: Royal Society of Chemistry journal article supplement (doi:10.1039/c3dt53493f), 2014-01-01
Supplement: c3dt53493f1.pdf [file c3dt53493f1.pdf]

## Supporting Information for

# Uniform Iron Oxide Hollow Spheres for High-performance Delivery of Insoluble Anticancer Drugs

*Yichen Zhu,<sup>a</sup> Jie Lei,<sup>b\*</sup> Ye Tian<sup>a\*</sup>*

*<sup>a</sup> Department of Urology, Beijing Friendship Hospital, Capital Medical University, Beijing, 100069 (P. R. China). E-mail: tianyebfh@gmail.com*

*<sup>b</sup> Department of MRI, Fourth Hospital of Jilin University, Changchun, 130011 (P. R. China). E-mail: lei\_jie\_1@hotmail.com*

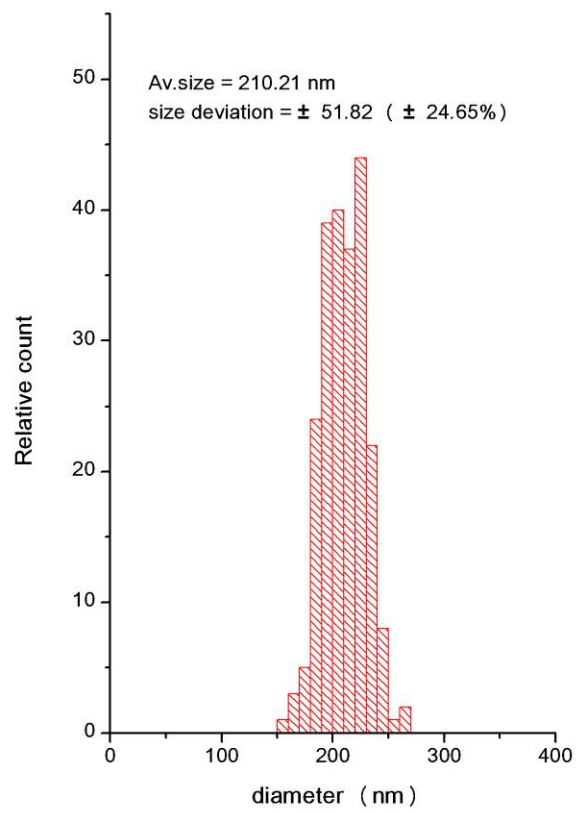

**Figure S1.** Particle-size distribution of Fe<sub>3</sub>O<sub>4</sub> hollow spheres.

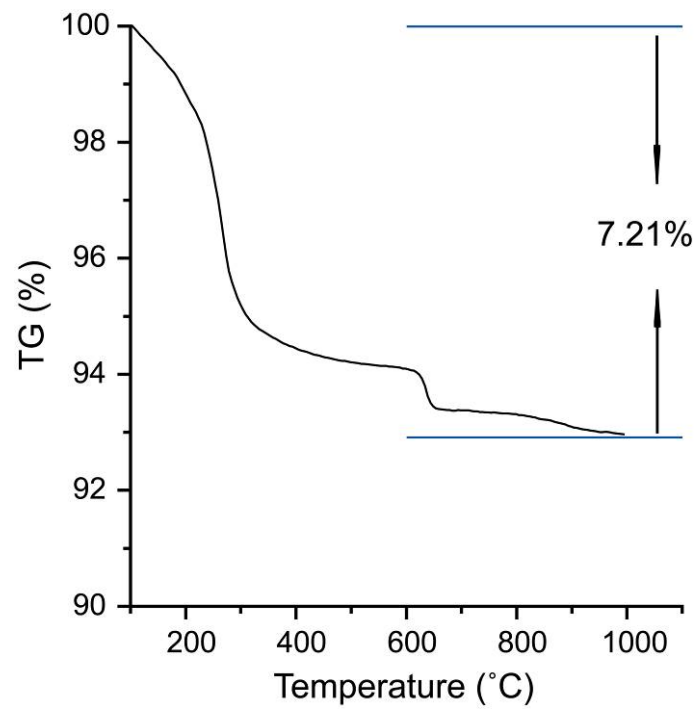

**Figure S2.** Thermogravimetric analysis (TGA) curve of  $\text{Fe}_3\text{O}_4$  hollow spheres in air.

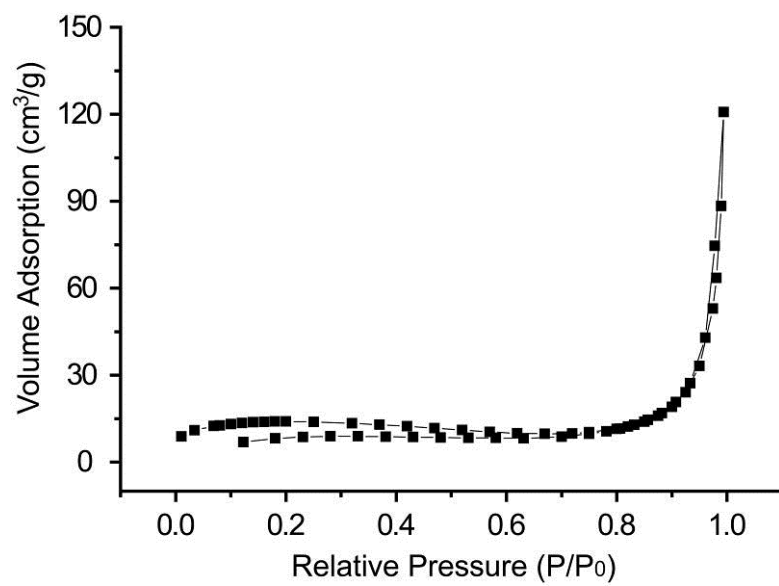

**Figure S3.** N<sub>2</sub> adsorption/desorption isotherms of Fe<sub>3</sub>O<sub>4</sub> hollow spheres.

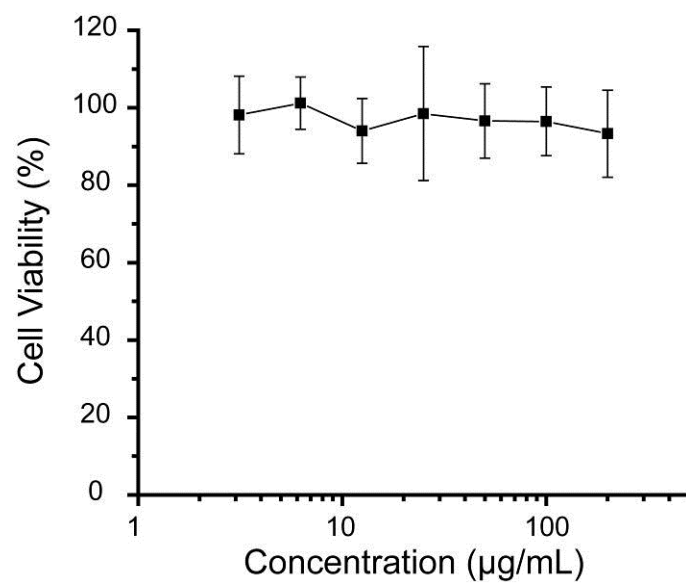

**Figure S4.** Effect of Fe<sub>3</sub>O<sub>4</sub> hollow spheres on the viability of NIH3T3 cells under 24 h of incubation.

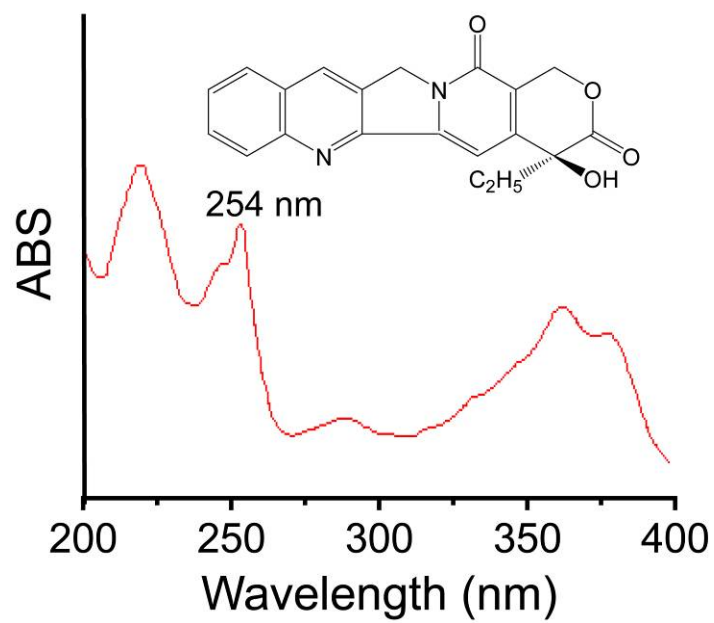

**Figure S5.** UV-vis spectrum and chemical structure of CPT molecules.

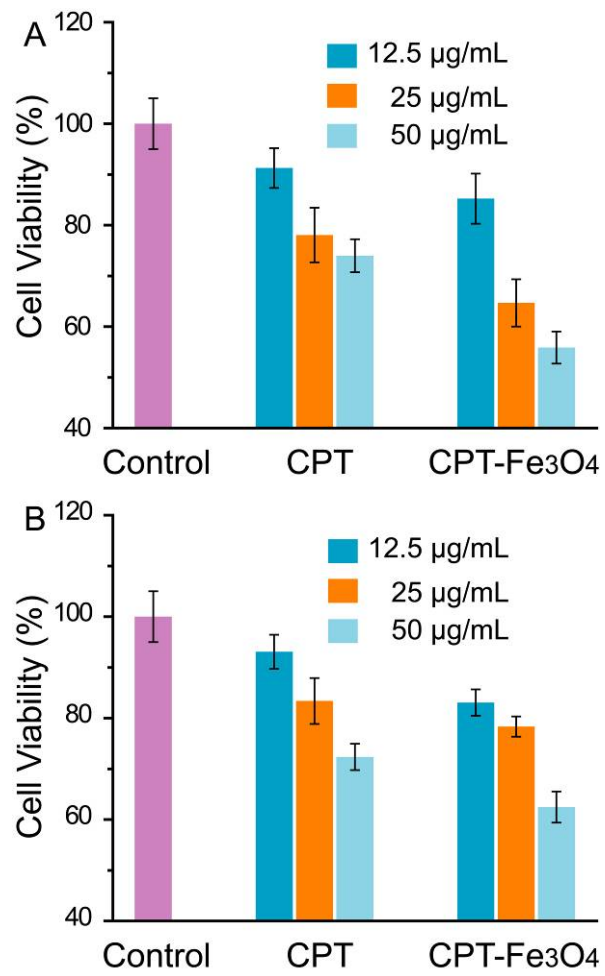

**Figure S6.** Viability of HepG2 cells (A) and Hela cells (B) incubated with CPT and CPT-Fe<sub>3</sub>O<sub>4</sub> upon different incubation concentrations.

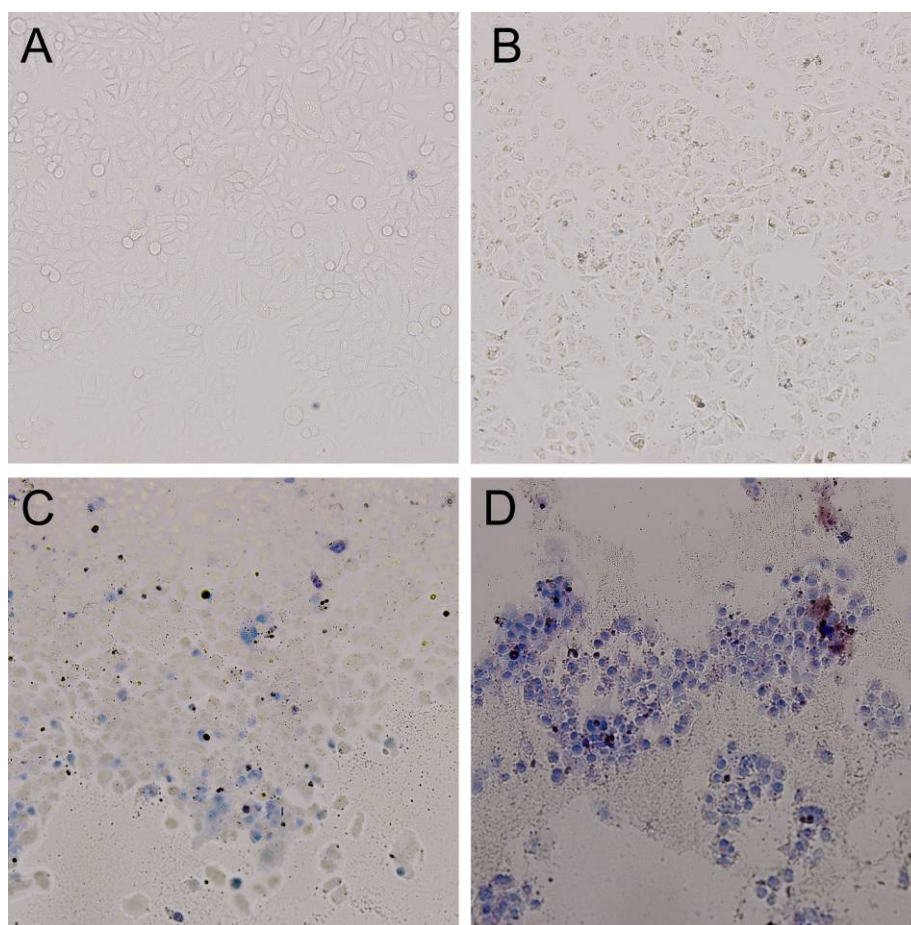

**Figure S7.** Optical microscopy images of trypan blue stained cells upon different incubation conditions: control (A), Fe<sub>3</sub>O<sub>4</sub> hollow spheres (B), CPT (C), as well as CPT-Fe<sub>3</sub>O<sub>4</sub> (D).
